# Supplementary material
Source: publisher figshare collection journal article supplement (https://brill.figshare.com/ndownloader/files/24669491)
Supplement: Supplementary file 1 [file 24669491]

**Mating behavior and spermatophore morphology of the whip  
scorpion *Typopeltis dalyi* Pocock, 1900 (Uropygi, Thelyphonida)**

**Michael Seiter\*, Marie Christine Moser and Thomas Schwaha**

Unit Integrative Zoology, Department of Evolutionary Biology, University of Vienna,

Althanstraße 14, 1090 Vienna, Austria

Submitted: April 28, 2020. Final revision received: July 13, 2020. Accepted: September 13,

2020

\*) Corresponding author; e-mail: [michael.seiter@univie.ac.at](mailto:michael.seiter@univie.ac.at)

**Supplementary material**

**Table S1.**

Mating attempts and successful mating in *Typopeltis dalyi*. In total, three males and six females were used in this study. Only five females mated successfully: one (F2) died between the behavioral studies. After a successful mating, attempts were made to mate each female with a male again, but without success. Abbreviations: F, female; M, male.

| Female | Male | Mating: attempt | Mating: successful |
|--------|------|-----------------|--------------------|
| F1     | M2   |                 | 09.11.2019         |
| F1     | M3   | 07.12.2019      |                    |
| F2     | M2   | 22.11.2019      |                    |
| F3     | M1   | 11.11.2019      |                    |
| F3     | M2   |                 | 15.11.2019         |
| F3     | M2   | 22.11.2019      |                    |
| F3     | M2   | 22.11.2019      |                    |
| F3     | M3   | 30.11.2019      |                    |
| F4     | M2   | 12.11.2019      |                    |
| F4     | M1   | 12.11.2019      |                    |
| F4     | M2   | 22.11.2019      |                    |
| F4     | M2   | 30.11.2019      |                    |
| F4     | M2   |                 | 05.12.2019         |
| F4     | M3   | 18.12.2019      |                    |
| F5     | M2   | 15.11.2019      |                    |
| F5     | M2   | 22.11.2019      |                    |
| F5     | M2   |                 | 25.11.2019         |
| F5     | M2   | 30.11.2019      |                    |
| F5     | M3   | 07.12.2019      |                    |
| F6     | M3   | 08.12.2019      |                    |
| F6     | M3   |                 | 19.12.2019         |
| F6     | M2   | 29.12.2019      |                    |
